# Supplementary material for: Chemoselective heterogeneous iridium catalyzed hydrogenation of cinnamalaniline
Source: Royal Society of Chemistry journal article supplement (doi:10.1039/d0cy01886d), 2020-12-10

# Supporting Information

## Chemoselective Heterogeneous Iridium Catalyzed Hydrogenation of Cinnamalaniline

Risto Savela,<sup>1</sup> Nataliya D. Shcherban,<sup>2</sup> Marko M. Melander,<sup>3</sup> Igor Bezverkhyy,<sup>4</sup>  
Irina L. Simakova,<sup>5</sup> Otto Långvik,<sup>1</sup> Ekaterina Kholkina,<sup>6</sup> Tamara Schindler,<sup>1</sup> Annabelle Krauß,<sup>1</sup>  
Karoliina Honkala,<sup>3</sup> Dmitry Yu. Murzin,<sup>6</sup> Reko Leino<sup>1</sup>

<sup>1</sup> *Johan Gadolin Process Chemistry Centre, Laboratory of Molecular Science and Technology, Organic Chemistry Research Group, Åbo Akademi University, FI-20500 Turku, Finland*

<sup>2</sup> *L.V. Piszarsky Institute of Physical Chemistry, National Academy of Sciences of Ukraine, 31 pr. Nauky, Kiev, 03028, Ukraine*

<sup>3</sup> *Department of Chemistry, Nanoscience Center, University of Jyväskylä, P.O. Box 35, FI-40014 Jyväskylä, Finland*

<sup>4</sup> *Laboratoire Interdisciplinaire Carnot de Bourgogne, UMR 6303 CNRS-Université de Bourgogne-Franche Comté, 9 Av. A. Savary, BP 47870, 21078, Dijon Cedex, France*

<sup>5</sup> *Boreskov Institute of Catalysis, pr. Ak. Lavrentieva 5, 630090, Novosibirsk, Russia*

<sup>6</sup> *Johan Gadolin Process Chemistry Centre, Laboratory of Industrial Chemistry and Reaction Engineering, Åbo Akademi University, Turku, Finland*

|                                                                            |   |
|----------------------------------------------------------------------------|---|
| <b>Concentration and Selectivity Profiles From Solvent Screening</b>       | 2 |
| <b>Concentration and Selectivity Profiles From Temperature Experiments</b> | 5 |
| <b>Selected Carbon Nitride Catalyst in Toluene at 60 C</b>                 | 6 |
| <b>Catalyst Recycling</b>                                                  | 7 |
| <b>Hot Filtration Test</b>                                                 | 8 |
| <b>Hydrogenation of Compound 2</b>                                         | 8 |
| <b>HP-SEC Chromatograms</b>                                                | 9 |

## Concentration and Selectivity Profiles From Solvent Screening.

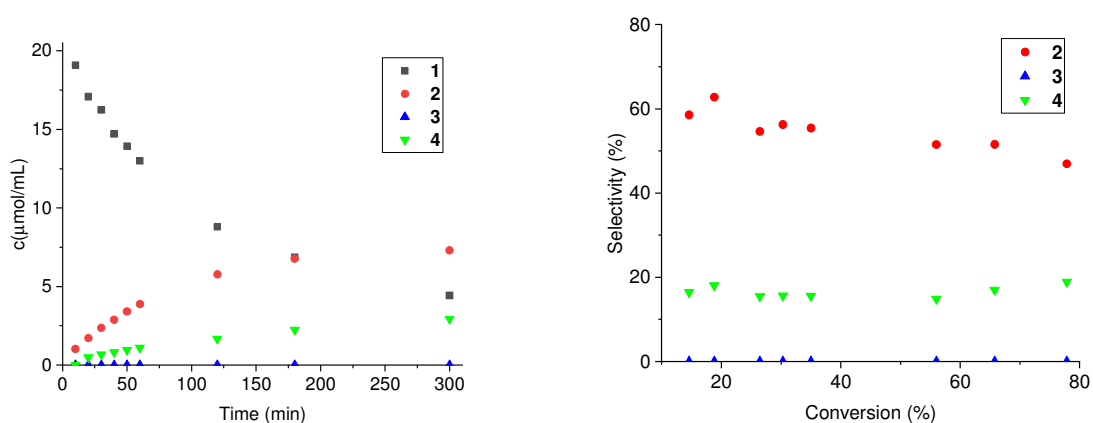

**Figure 1.** 1 mol-% Ir/Al<sub>2</sub>O<sub>3</sub> catalyst in cinnamalaniline **1** hydrogenation using 2-propanol as solvent at 40 °C. Left: Concentration vs. Time; right: Selectivity vs. Conversion.

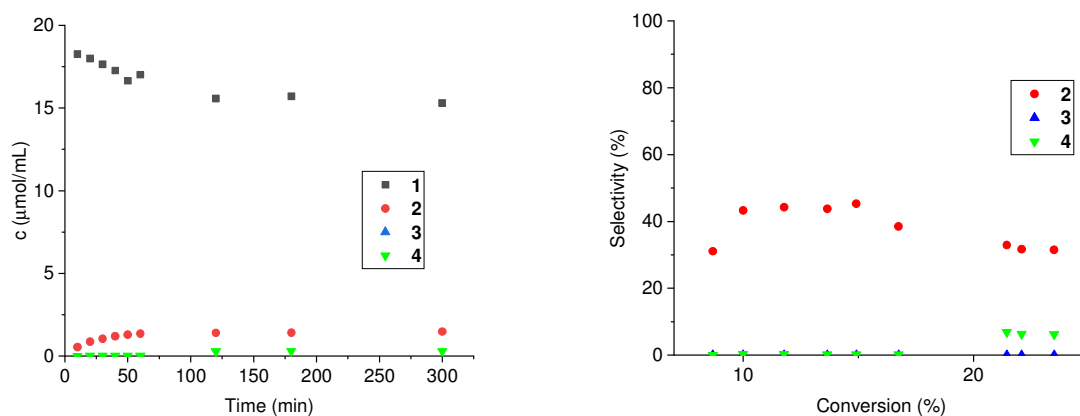

**Figure 2.** 1 mol-% Ir/Al<sub>2</sub>O<sub>3</sub> catalyst in cinnamalaniline **1** hydrogenation using MTBE as solvent at 40 °C. Left: Concentration vs. Time; right: Selectivity vs. Conversion.

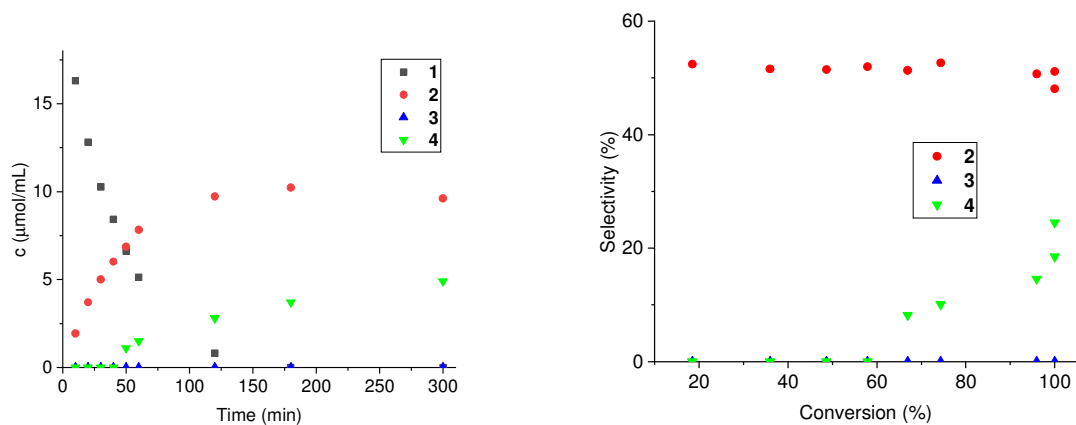

**Figure 3.** 1 mol-% Ir/ZrO<sub>2</sub> catalyst in cinnamalaniline **1** hydrogenation using methanol as solvent at 40 °C. Left: Concentration vs. Time; right: Selectivity vs. Conversion.

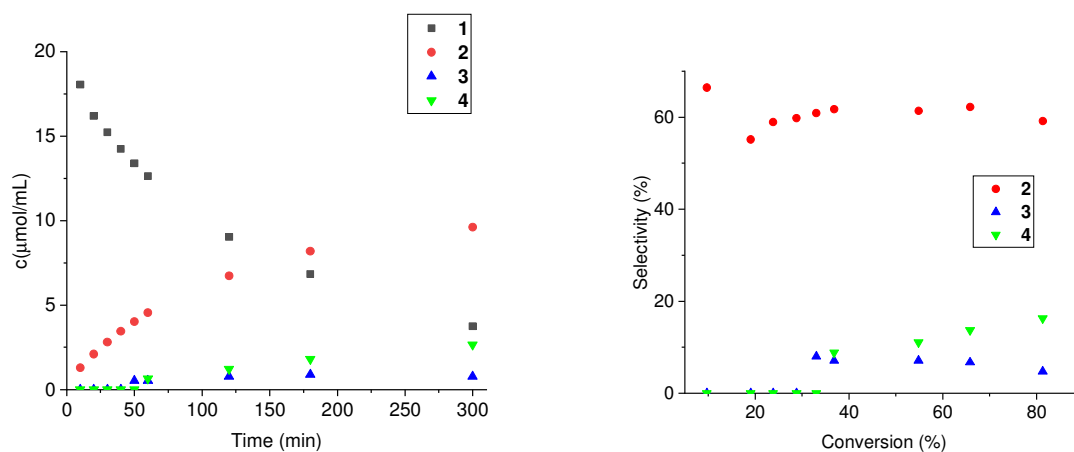

**Figure 4.** 1 mol-% Ir/ZrO<sub>2</sub> catalyst in cinnamalaniline **1** hydrogenation using toluene as solvent at 40 °C. Left: Concentration vs. Time; right: Selectivity vs. Conversion.

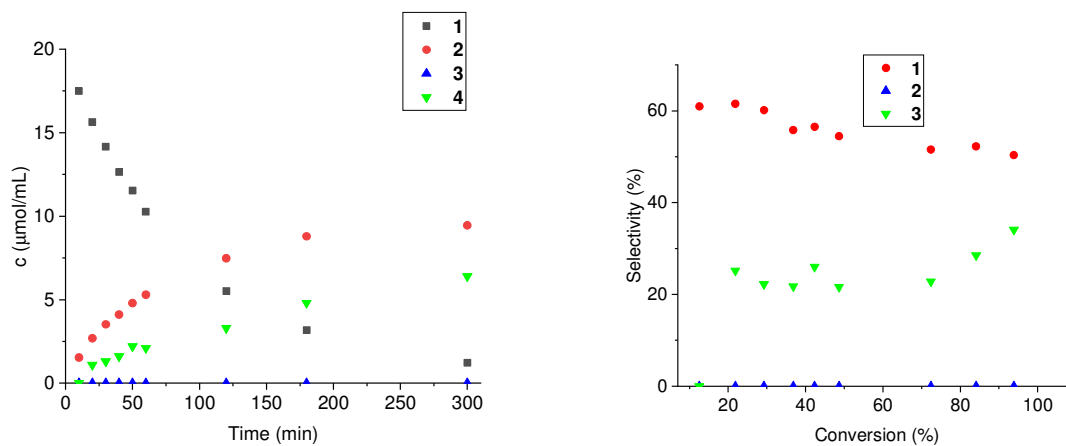

**Figure 5.** 1 mol-% Ir/ZrO<sub>2</sub> catalyst in cinnamalaniline **1** hydrogenation using 2-propanol as solvent at 40 °C. Left: Concentration vs. Time; right: Selectivity vs. Conversion.

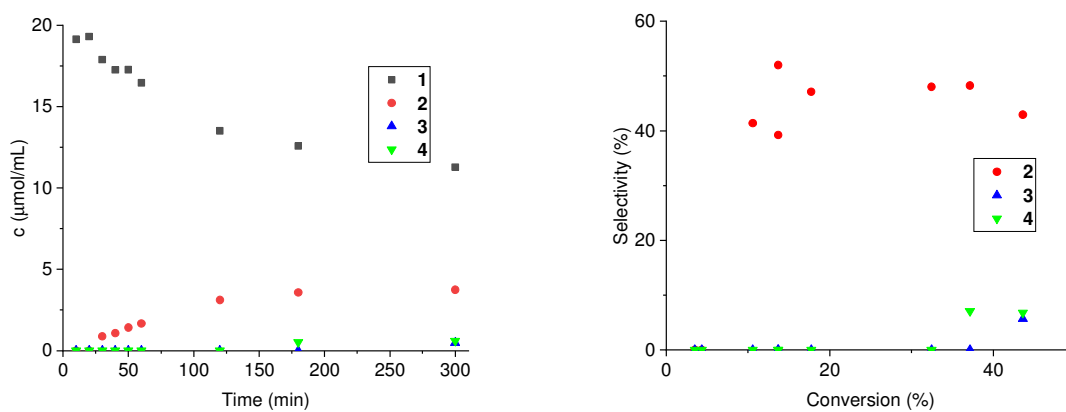

**Figure 6.** 1 mol-% Ir/ZrO<sub>2</sub> catalyst in cinnamalaniline **1** hydrogenation using MTBE as solvent at 40 °C. Left: Concentration vs. Time; right: Selectivity vs. Conversion.

## Concentration and Selectivity Profiles From Temperature Experiments.

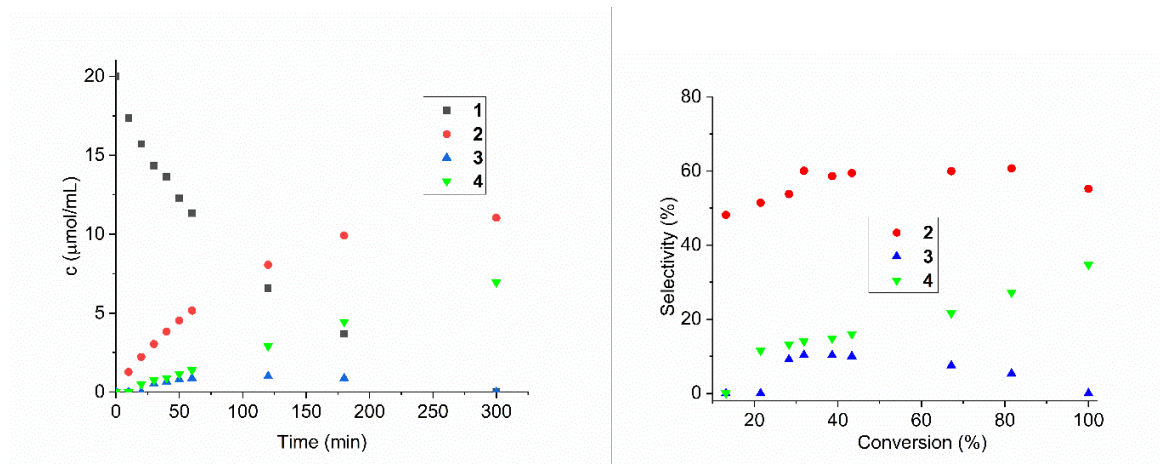

**Figure 7.** 1 mol-% Ir/ $\text{Al}_2\text{O}_3$  catalyst in cinnamalaniline **1** hydrogenation using Toluene as solvent at 80 °C. Left: Concentration vs. Time; right: Selectivity vs. Conversion.

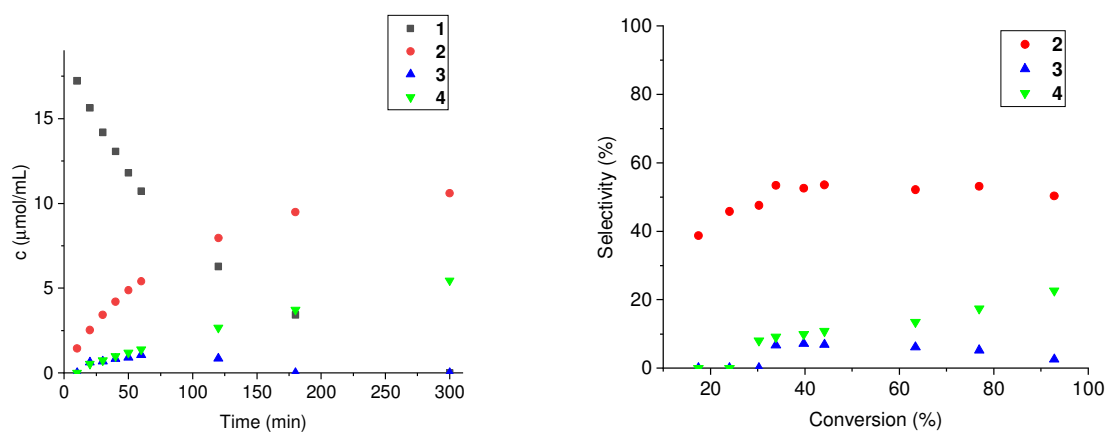

**Figure 8.** 1 mol-% Ir/ $\text{ZrO}_2$  catalyst in cinnamalaniline **1** hydrogenation using Toluene as solvent at 60 °C. Left: Concentration vs. Time; right: Selectivity vs. Conversion.

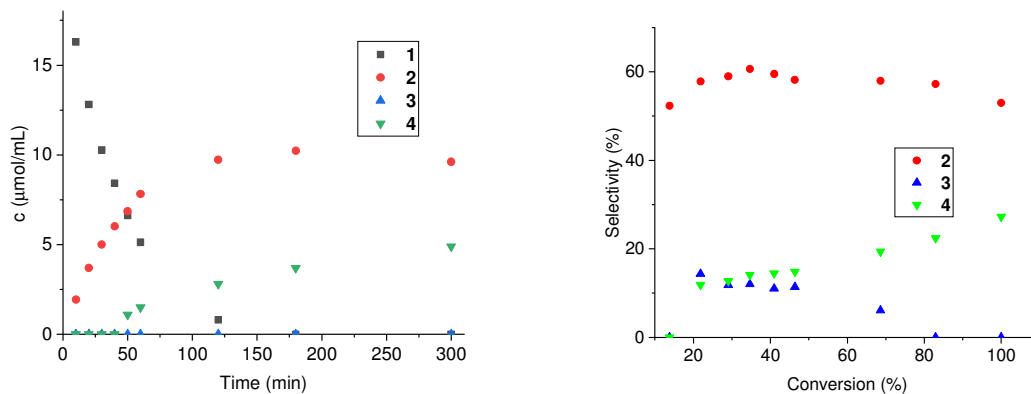

**Figure 9.** 1 mol-% Ir/ZrO<sub>2</sub> catalyst in cinnamalaniline **1** hydrogenation using Toluene as solvent at 80 °C. Left: Concentration vs. Time; right: Selectivity vs. Conversion.

### Selected Carbon Nitride Catalyst in Toluene at 60 C

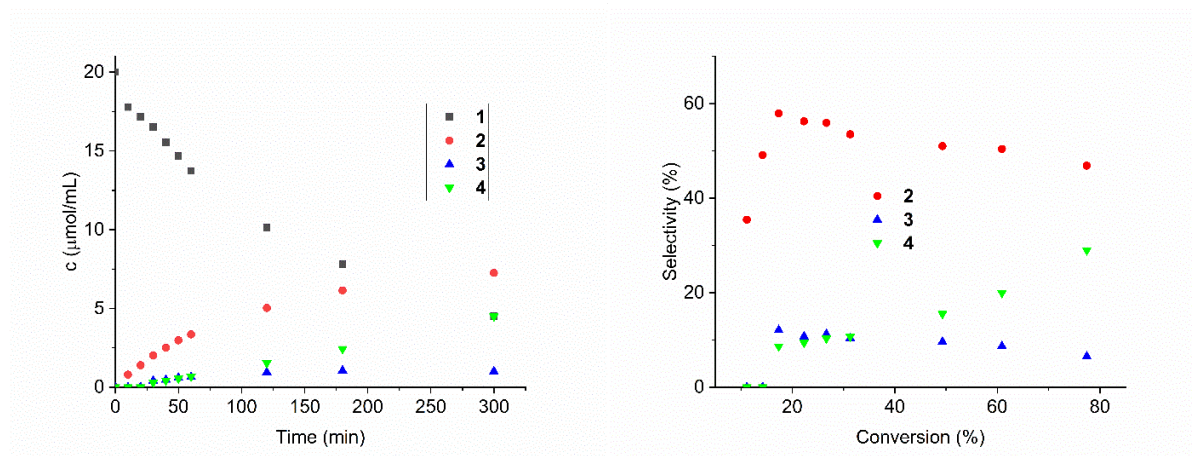

**Figure 10.** 1 mol-% Ir/C<sub>3</sub>N<sub>4</sub>-NH<sub>4</sub>Cl catalyst in cinnamalaniline **1** hydrogenation using Toluene as solvent at 60 °C. Left: Concentration vs. Time; right: Selectivity vs. Conversion.

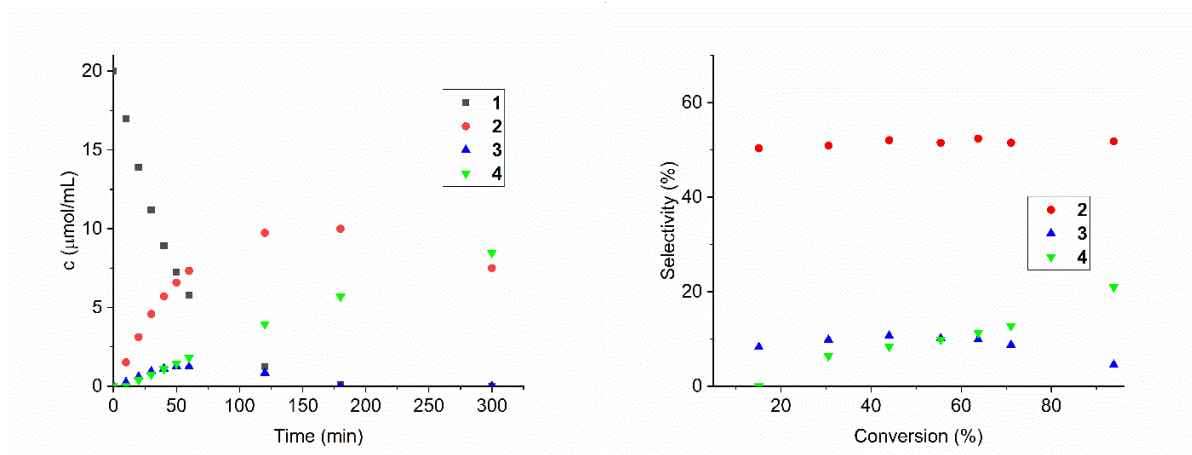

**Figure 11.** 1 mol-% Ir/C<sub>x</sub>N<sub>y</sub>-KIT-6 catalyst in cinnamalaniline **1** hydrogenation using Toluene as solvent at 60 °C. Left: Concentration vs. Time; right: Selectivity vs. Conversion.

### Catalyst Recycling

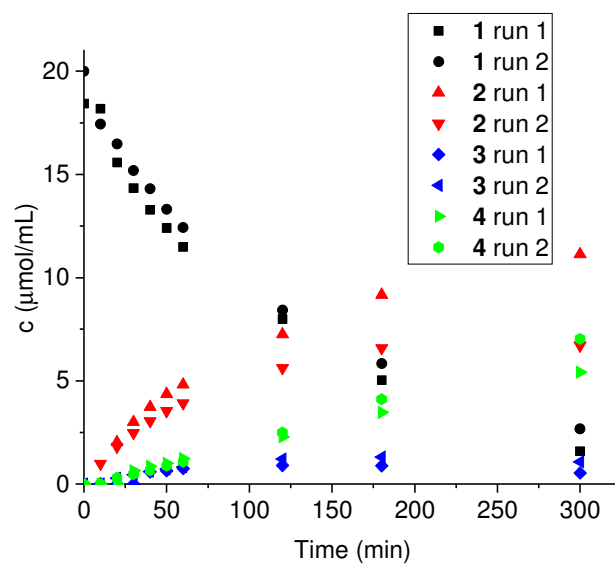

**Figure 12.** 1 mol-% Ir/Al<sub>2</sub>O<sub>3</sub> catalyst in cinnamalaniline **1** hydrogenation using Toluene as solvent at 60 °C.

## Hot Filtration Test

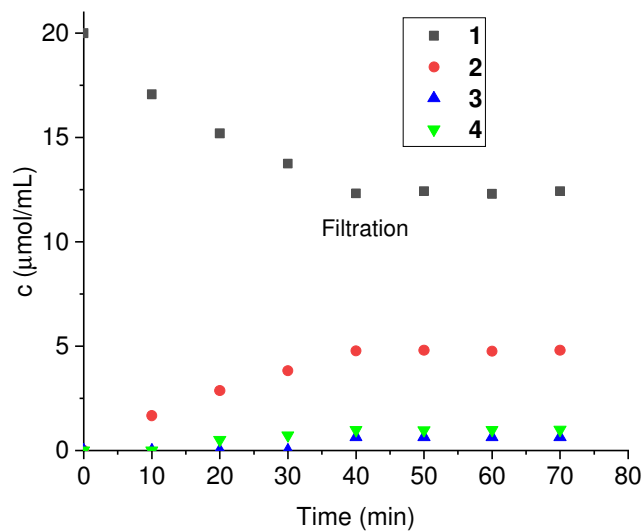

**Figure 12.** 1 mol-% Ir/Al<sub>2</sub>O<sub>3</sub> catalyst in cinnamalaniline **1** hydrogenation using Toluene as solvent at 60 °C. Filtration of the Catalyst at 40 min.

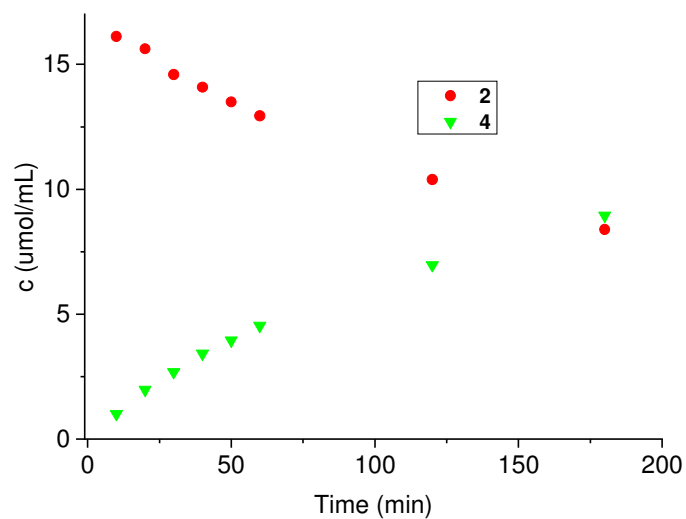

**Figure 13.** 1 mol-% Ir/Al<sub>2</sub>O<sub>3</sub> catalyst in compound **2** hydrogenation using toluene as solvent at 40 °C.



## HP-SEC Chromatograms

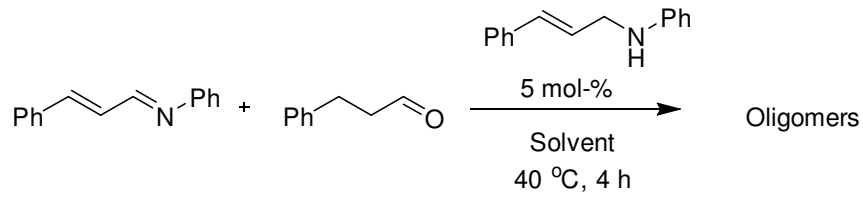

Solvent: Methanol

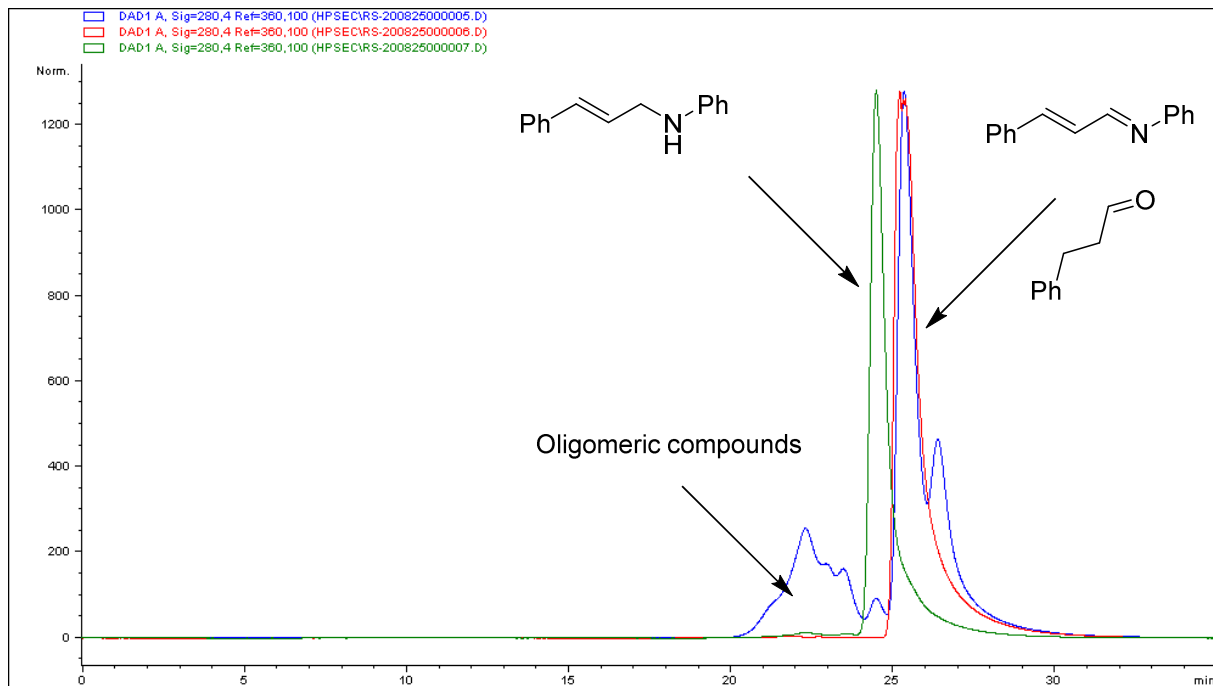

**Solvent: Toluene**

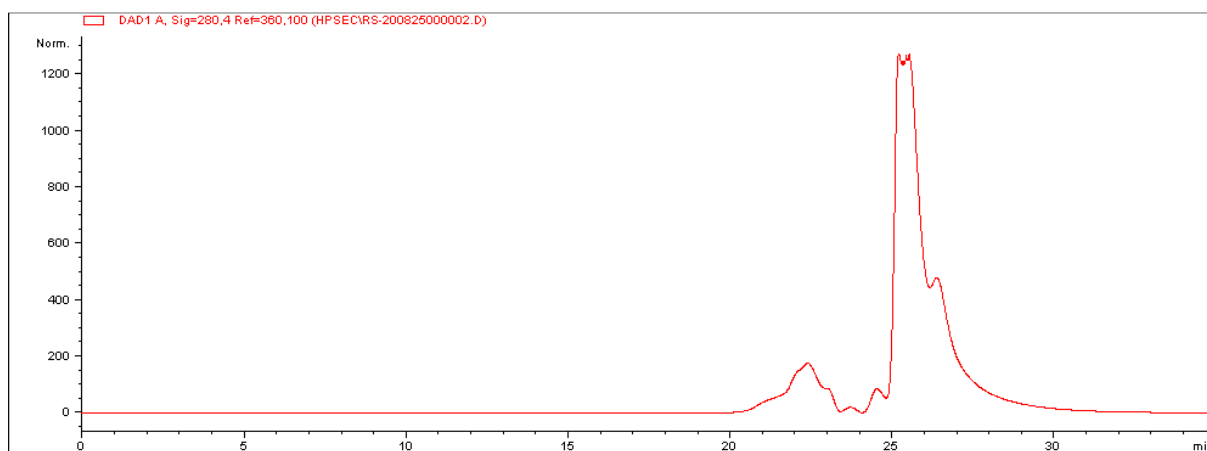

**Solvent: MTBE**

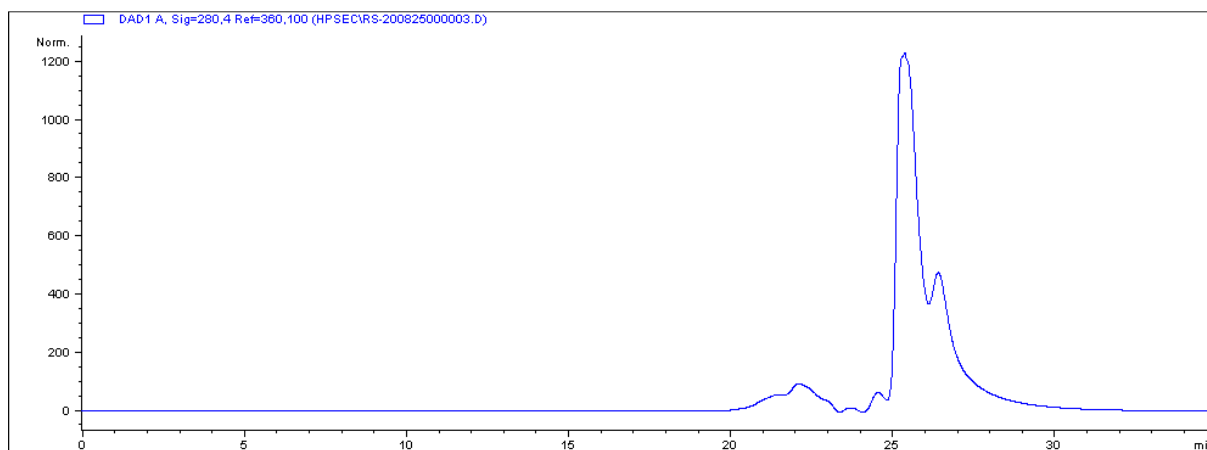

Solvent: 2-Propanol

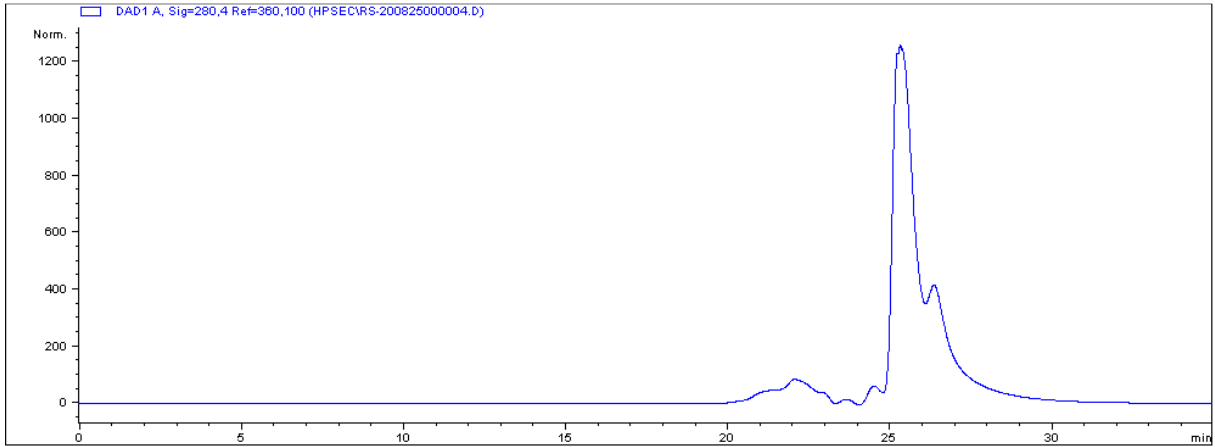

**Ir/Al<sub>2</sub>O<sub>3</sub> MTBE 5 hour 40 °C**

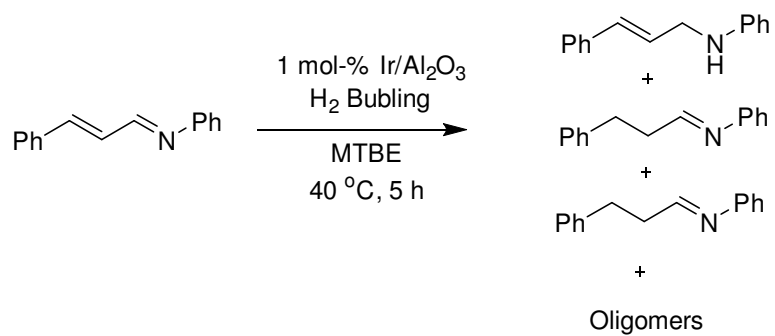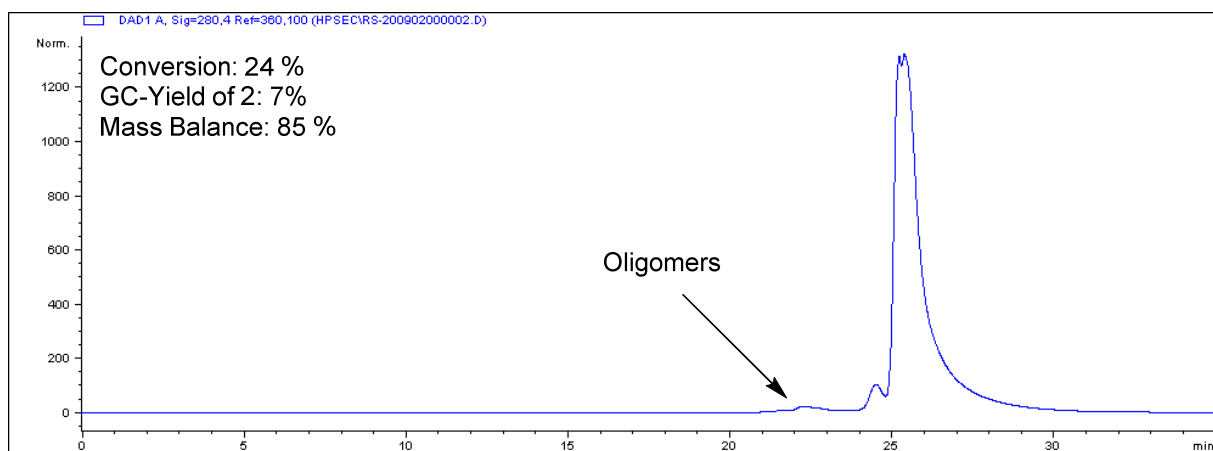

Supplement: d0cy01886d1.pdf [file d0cy01886d1.pdf]
